# Supplementary material for: Legionella pneumophila and Free-Living Nematodes: Environmental Co-Occurrence and Trophic Link
Source: MDPI journal article supplement (doi:10.3390/microorganisms11030738), 2023-03-13
Supplement: s1 [file s1]

**TABLE S1** Location and water temperature [°C] of swimming lakes in Berlin-Brandenburg investigated during the field campaign in summer 2018. The lakes were only sampled when biofilm was detected (+ detection, - no detection).

| Name                   | Region      | Latitude      | Longitude     | Water temperature | Biofilm detection | Reference |
|------------------------|-------------|---------------|---------------|-------------------|-------------------|-----------|
| Dewinsee               | Brandenburg | 52°44'30.6''N | 13°38'46.0''E | N/A               | -                 |           |
| Flakensee              | Brandenburg | 52°25'59.0''N | 13°45'55.9''E | 20.7              | -                 | 1         |
| Flughafensee           | Berlin      | 52°34'06.6''N | 13°17'09.0''E | 27.7              | +                 | 2         |
| Gorinsee               | Brandenburg | 52°41'16.0''N | 13°28'06.5''E | 27.7              | -                 | 3         |
| Großer Wukensee        | Brandenburg | 52°46'27.1''N | 13°36'22.8''E | 27.7              | -                 | 3         |
| Jungfernheideteich     | Berlin      | 52°32'37.5''N | 13°16'36.2''E | N/A               | -                 |           |
| Kalksee                | Brandenburg | 52°27'30.1''N | 13°45'54.8''E | 21.5              | +                 | 1         |
| Kiessee Schildow       | Brandenburg | 52°39'10.3''N | 13°22'58.5''E | 23.3              | +                 | 4         |
| Krumme Lanke           | Berlin      | 52°27'06.0''N | 13°13'54.6''E | 27.1              | -                 | 5         |
| Motzener See           | Brandenburg | 52°12'49.6''N | 13°34'28.0''E | N/A               | -                 |           |
| Mühlenbecker See       | Brandenburg | 52°41'29.7''N | 13°23'43.1''E | N/A               | -                 |           |
| Mühlenteich            | Brandenburg | 52°41'41.9''N | 13°24'40.9''E | N/A               | -                 |           |
| Obersee                | Brandenburg | 52°45'38.2''N | 13°33'02.8''E | 26.7              | -                 | 3         |
| Pätzer Hintersee       | Brandenburg | 52°12'29.8''N | 13°37'52.2''E | N/A               | -                 |           |
| Plötzensee             | Berlin      | 52°32'37.4''N | 13°19'50.9''E | 27.6              | -                 | 6         |
| Quarry pond Arkenberge | Berlin      | 52°38'15.3''N | 13°24'37.1''E | N/A               | +                 |           |
| Quarry pond Biesdorf   | Berlin      | 52°30'11.5''N | 13°32'54.7''E | 26.6              | +                 | 7         |
| Rahmer See             | Brandenburg | 52°45'01.0''N | 13°25'01.2''E | 22.8              | +                 | 4         |
| Schlachtensee          | Berlin      | 52°26'35.7''N | 13°13'03.9''E | 22.0              | -                 | 8         |
| Stolzenhagener See     | Brandenburg | 52°45'43.8''N | 13°26'14.0''E | 26.6              | +                 | 3         |
| Summter See            | Brandenburg | 52°41'35.0''N | 13°22'20.7''E | N/A               | -                 |           |
| Tegeler See            | Berlin      | 52°34'33.5''N | 13°15'23.8''E | 23.0              | -                 | 8         |
| Wandlitzer See         | Brandenburg | 52°45'23.0''N | 13°28'02.9''E | 26.6              | +                 | 3         |
| Wannsee                | Berlin      | 52°26'14.2''N | 13°10'18.6''E | N/A               | -                 |           |
| Weißer See             | Berlin      | 52°33'17.2''N | 13°27'47.8''E | 24.0              | +                 | 8         |
| Zeesener See           | Brandenburg | 52°16'12.1''N | 13°38'48.8''E | N/A               | -                 |           |

## References

1. [https://www.landkreis-oder-spree.de/media/custom/2689\\_1595\\_1.PDF?1530869752](https://www.landkreis-oder-spree.de/media/custom/2689_1595_1.PDF?1530869752) [Accessed: 20.10.2022]
2. <https://wasserportal.berlin.de/station.php?anzeige=tg&sgrafik=g&stable=ows&sstation=5800303> [Accessed: 20.10.2022]
3. <https://presse.barnim.de/documents/tabelle-badewasserqualitaet-80833> [Accessed: 20.10.2022]
4. <https://hohen-neuendorf.de/de/stadt-leben/aktuelles/badewarnungen-fuer-drei-seen> [Accessed: 20.10.2022]
5. <https://wasserportal.berlin.de/station.php?anzeige=tg&sgrafik=g&stable=ows&sstation=5800107> [Accessed: 20.10.2022]
6. <https://wasserportal.berlin.de/station.php?anzeige=tg&sgrafik=g&stable=ows&sstation=5800312> [Accessed: 20.10.2022]
7. <https://wasserportal.berlin.de/station.php?anzeige=tg&sgrafik=g&stable=ows&sstation=5800317> [Accessed: 20.10.2022]
8. <https://www.morgenpost.de/berlin/article214942137/Sportlich-schick-romantisch-Badeseen-fuer-jeden-Typ.html> [Accessed: 20.10.2022]
